# Supplementary material for: Simple, PCR-free telomerase activity detection using G-quadruplex–hemin DNAzyme
Source: Royal Society of Chemistry journal article supplement (doi:10.1039/c4ra14460k), 2014-12-19
Supplement: c4ra14460k1.pdf [file c4ra14460k1.pdf]

## Supporting Information

### **Simple, PCR-free telomerase activity detection using G- quadruplex-hemin DNzyme**

Hui Li,<sup>a,b,l</sup> Hai-Wei Fu,<sup>a,b,l</sup> Ting Zhao,<sup>a,b</sup> and De-Ming Kong<sup>\*a,b,c</sup>

<sup>a</sup> State Key Laboratory of Medicinal Chemical Biology, College of Chemistry, Nankai University, Tianjin 300071, China.

<sup>b</sup> Collaborative Innovation Center of Chemical Science and Engineering (Tianjin), Tianjin 300071, China.

<sup>c</sup> Tianjin Key Laboratory of Biosensing and Molecular Recognition, Research Centre for Analytical Sciences, Nankai University, Tianjin 300071, China.

E-mail: kongdem@nankai.edu.cn; Fax: (+86)-22-23502458; Tel: (+86)-22-23500938

### Examination the generation of short extension product by polyacrylamide gel electrophoresis (PAGE)

25  $\mu\text{L}$  reaction mixture containing 20 mM Tris-HCl buffer (pH 8.2), 1.5 mM  $\text{MgCl}_2$ , 63 mM KCl, 0.005% Tween 20, 1 mM EGTA, 0.1 mg/mL BSA, 1 mM dGTP, 0.6  $\mu\text{M}$  fluorescence (FAM)-labelled telomerase primer (FAM-TgggTAgggCgggTTA-3') and cell extract from 10,000 HeLa cells, was prepared. The mixture was incubated at 37  $^\circ\text{C}$  for 1.5 h for telomerase-triggered primer extension. After that, 5  $\mu\text{L}$  of loading buffer (0.25% bromophenol blue, 0.25% xylene cyanol, 30% glycerol, 10 mM EDTA) was added. 30  $\mu\text{L}$  of samples were loaded on 20% polyacrylamide gel. Electrophoresis was carried out in 1 $\times$ TBE buffer at 10 V  $\text{cm}^{-1}$  for 3 h at room temperature. The gel was photographed using a Gel Documentation system (Huifuxingye, Beijing, China).

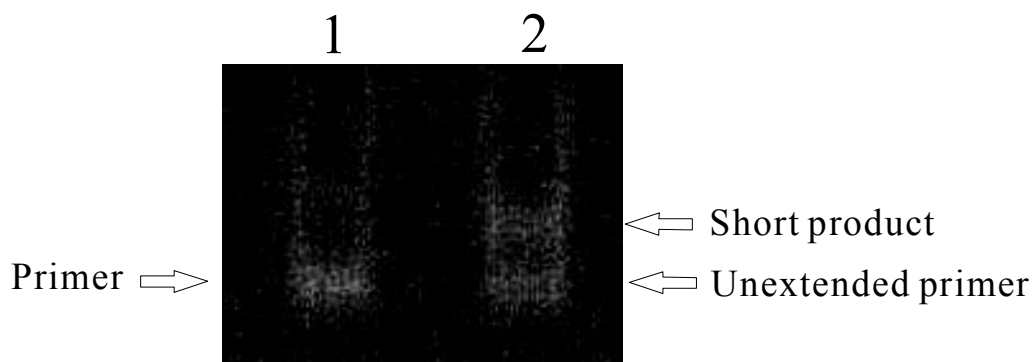

**Fig. S1** PAGE analysis of active telomerase-triggered extension of the primer. Lane 1: without cell extract; Lane 2: with cell extract from 10,000 HeLa cells. In this experiment, dGTP, but not dNTPs, was used. Fluorescence (FAM)-labelled telomerase primer (FAM-TgggTAgggCgggTTA-3') was used, and the DNA bands were observed using the fluorescence of FAM.
